# Supplementary material
Source: HighWire-hosted journal article supplement (https://diabetes.diabetesjournals.org/content/suppl/2007/09/11/db07-0767)

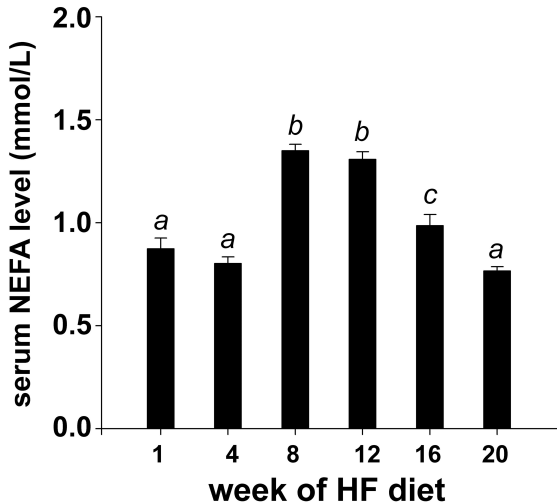

Supplement: DB070767AppendixFigure4.pdf [file DB070767AppendixFigure4.pdf]
